Title: GENETIC VARIATION OF ANESTHETIC RESPONSE IN *C.elegans*

Authors: P. G. Morgan, M.D.<sup>(1)</sup>, M. M. Sedensky, M.D.<sup>(1)</sup>,  
H. F. Cascorbi, M.D., Ph.D.<sup>(1)</sup> and P. M. Meneely, Ph.D.<sup>(2)</sup>

Affiliation: <sup>(1)</sup>Department of Anesthesia, Case Western Reserve University,  
University Hospitals of Cleveland, Cleveland, Ohio 44106 and  
<sup>(2)</sup>Fred Hutchinson Cancer Research Center, Seattle, Washington 98104.

**INTRODUCTION:** We are attempting to understand the mechanism of action of volatile anesthetics by means of a simple animal model—the nematode, *Caenorhabditis elegans* (C.e.). We are studying the effect of genetic variation on sensitivity to a wide range of anesthetics. We have previously shown that the wild type strain (N<sub>2</sub>) of C.e. responds to volatile anesthetics like more complex animals<sup>(1)</sup>. In our earlier work we also found a mutant with altered anesthetic sensitivity and thus began the analyses necessary to isolate gene products that control anesthetic response. This strain was identified as a previously known mutant, *unc-79*<sup>(2)</sup>. We have now identified a second gene, *unc-80*, which also causes altered sensitivities to several anesthetics. We present here additional data describing the response of N<sub>2</sub> and *unc-79* to diethylether and the very lipid soluble agent, thiomethoxyflurane. In addition, we describe the responses of *unc-80* and a strain containing both mutations, *unc-79* and *unc-80*, to nine anesthetics. We also examine the relationship of the potencies to the oil gas partition coefficients (O/G<sub>a</sub>) for these anesthetics.

#### MATERIALS AND METHODS:

**Nematodes:** C.e. strains N<sub>2</sub> and *unc-80* were obtained from the *Caenorhabditis* Genetics Center in Columbia, Missouri. *unc-79* was generated as previously described<sup>(1)</sup>.

**Cultures:** Cultures were prepared as previously described<sup>(1)</sup> except that we now prepare the growth agar without the addition of uracil. This allows for a thinner lawn of E.coli on the plates. Under these conditions the nematodes are more easily visualized and move more vigorously.

**Dose-Response Curves:** Dose-response studies were performed as previously described.<sup>(1)</sup> Each study consisted of at least twenty different concentrations of anesthetic, with at least fifty individuals counted at each concentration. Data were analyzed by the methods described by Waud<sup>(3)</sup>.

**RESULTS:** We studied the quantitative response of four strains to eight anesthetics. The mean ED50s with standard errors are presented in the table. As previously noted with N<sub>2</sub> and *unc-79* (labeled HS1 in our previous report), the ED50s for *unc-80* and the double mutant *unc-79;unc-80* tended to increase as the (O/G<sub>a</sub>)s of the anesthetics decreased. The responses fell into four groups.

1). For the highly lipid soluble anesthetics (thiomethoxyflurane [TMOF], methoxyflurane [MOF], chloroform [CH], halothane [H]), *unc-79*, *unc-80*, and the double mutant *unc-79;unc-80* were all hypersensitive compared to N<sub>2</sub>. *unc-79* was consistently more sensitive than *unc-80*, while the double mutant was very similar to *unc-79* in these anesthetics.

2). For enflurane (E) and flurothyl (FLR), *unc-79* and *unc-80* were resistant compared to N<sub>2</sub>, *unc-79* being more resistant than *unc-80*. The double mutant had an ED50 similar to N<sub>2</sub> in both cases.

3). For isoflurane (ISO) and fluroxone (FLX), *unc-79* and *unc-80* showed a small increase in sensitivity compared to N<sub>2</sub>. The double mutant showed a slight increase in sensitivity compared to either single mutant.

4). In diethylether (DE), *unc-79*, *unc-80* and *unc-79;unc-80* all showed equal and moderate increases in sensitivity.

**DISCUSSION:** All three mutant strains showed large increases in sensitivities compared to N<sub>2</sub> when exposed to the very lipid soluble anesthetics. In contrast any differences seen in the less lipid soluble anesthetics were small. The ln-ln plot of potencies vs. (O/G<sub>a</sub>)s for these anesthetics closely approximates a straight line with slope -1 for N<sub>2</sub>. The Meyer-Overton model of anesthesia depends on this relationship. However, in each of the mutant strains there is a discontinuity between enflurane (O/G<sub>a</sub> = 98) and halothane (O/G<sub>a</sub> = 224). We interpret the alteration in sensitivities as indicative of an alteration at the locus of action of volatile anesthetics.

#### REFERENCES:

1. Morgan PG, Cascorbi HF: Effect of anesthetics and a convulsant on normal and mutant *Caenorhabditis elegans*. *Anesthesiology* 62:738-744, 1985.
2. Sedensky MM, Meneely PM: Genetic analysis of halothane sensitivity in *Caenorhabditis elegans*. Science, In Press.
3. Waud DR: On biological assays involving quantal responses. *J Pharmacol Exp Ther* 183:577-607, 1972.

|      | N <sub>2</sub> | <i>unc-79</i> | <i>unc-80</i> | <i>unc-79;unc-80</i> |
|------|----------------|---------------|---------------|----------------------|
| TMOF | 0.29<br>±0.04  | 0.09<br>±0.03 | 0.15<br>±0.03 | 0.08<br>±0.05        |
| MOF  | 0.58<br>±0.02  | 0.28<br>±0.05 | 0.46<br>±0.03 | 0.25<br>±0.10        |
| CH   | 1.47<br>±0.02  | 0.50<br>±0.03 | 0.80<br>±0.02 | 0.54<br>±0.03        |
| H    | 3.18<br>±0.04  | 0.98<br>±0.02 | 1.20<br>±0.02 | 0.72<br>±0.02        |
| E    | 5.89<br>±0.08  | 6.24<br>±0.07 | 6.06<br>±0.07 | 5.82<br>±0.07        |
| ISO  | 7.18<br>±0.07  | 6.67<br>±0.08 | 6.14<br>±0.07 | 5.84<br>±0.07        |
| DE   | 7.53<br>±0.07  | 5.70<br>±0.06 | 5.84<br>±0.06 | 5.60<br>±0.06        |
| FLX  | 10.8<br>±0.07  | 10.1<br>±0.07 | 10.4<br>±0.07 | 9.9<br>±0.07         |
| FLR  | 14.3<br>±0.10  | 15.9<br>±0.11 | 14.9<br>±0.10 | 14.5<br>±0.08        |

Legend: ED50s ± SE for four strains of *C.elegans* in nine anesthetics.  
For abbreviations, see text.
